# Supplementary material for: Daptomycin Liposomes Exhibit Enhanced Activity against Staphylococci Biofilms Compared to Free Drug
Source: Preprints.org preprint supplement (doi:10.20944/preprints202402.1422.v1), 2024-02-26
Supplement: Supplementary file 1 [file supplementary]

## Supplementary Figure S2: Control study to evaluate Empty Liposome effect on Prevention and Treatment of Bacterial Biofilms

Figure S2-1: Biofilm Prevention Study results

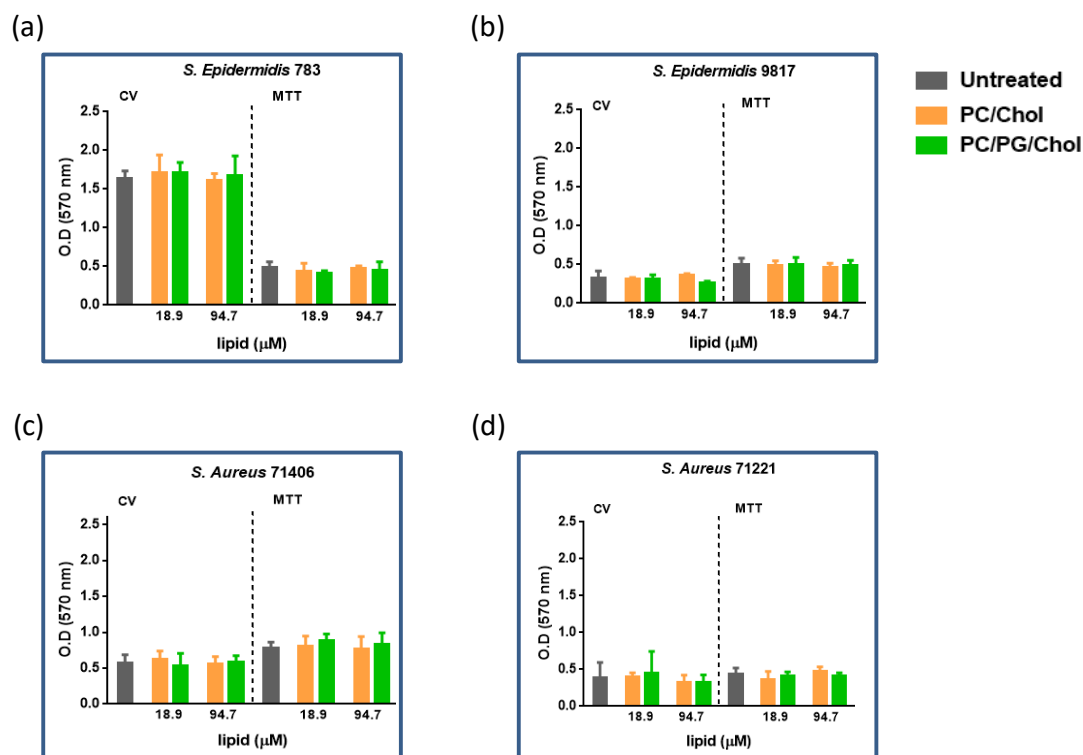

**Figure S2-1.** OD-values of empty liposomes and untreated biofilms, for biofilm mass (CV) and biofilm bacteria viability (MTT) of (a) *S. epidermidis* 783, (b) *S. epidermidis* 9817, (c) *S. aureus* 71406 and (d) *S. aureus* 71221, by empty liposomes at the same concentrations used in the Dapto liposome biofilm prevention experiments of Figure 7. No Significance differences were detected between empty liposome values and corresponding untreated values, for any liposome type (composition)

**Figure S2-2: Biofilm Treatment Study results**

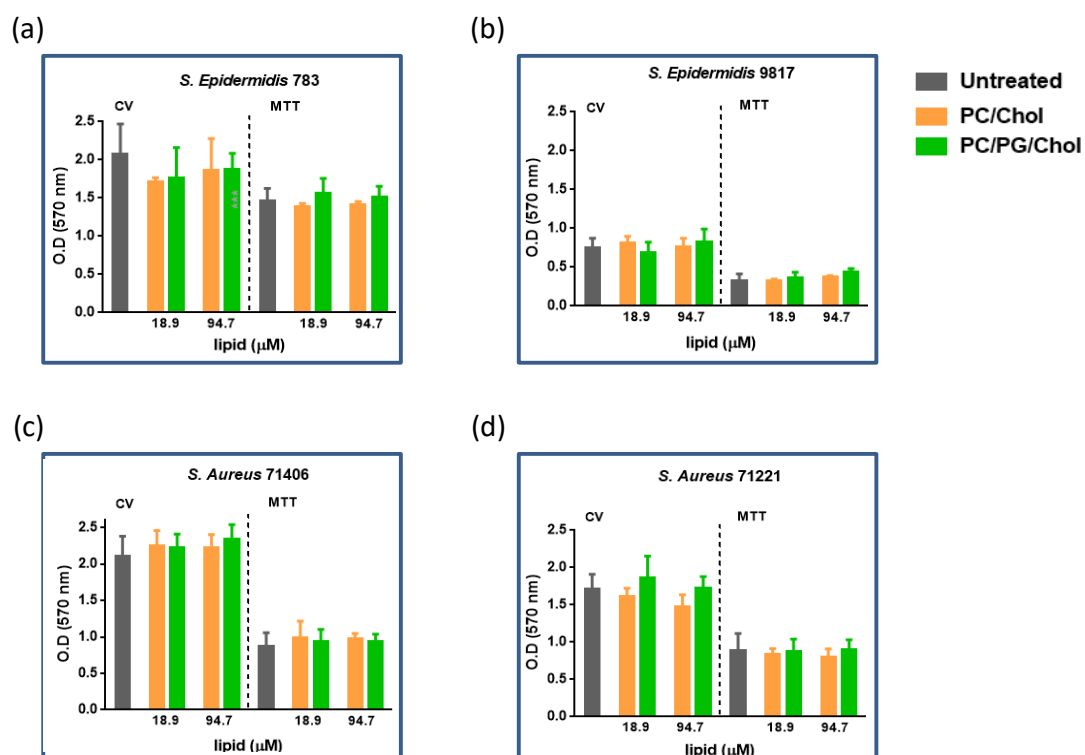

**Figure S2-2.** OD-values of empty liposomes and untreated biofilms, for biofilm mass (CV) and biofilm bacteria viability (MTT) of (a) *S.epidermidis* 783, (b) *S.epidermidis* 9817, (c) *S. aureus* 71406 and (d) *S. aureus* 71221, by empty liposomes at the same concentrations used in the Dapto liposome biofilm prevention experiments of Figure 8. No Significance differences were detected between empty liposome values and corresponding untreated values, for any liposome type (composition)
