# Supplementary material for: Daptomycin Liposomes Exhibit Enhanced Activity against Staphylococci Biofilms Compared to Free Drug
Source: Preprints.org preprint supplement (doi:10.20944/preprints202402.1422.v1), 2024-02-26
Supplement: Supplementary file 2 [file supplementary]

## Supplementary Figure S1: Physical stability of Dapto liposomes

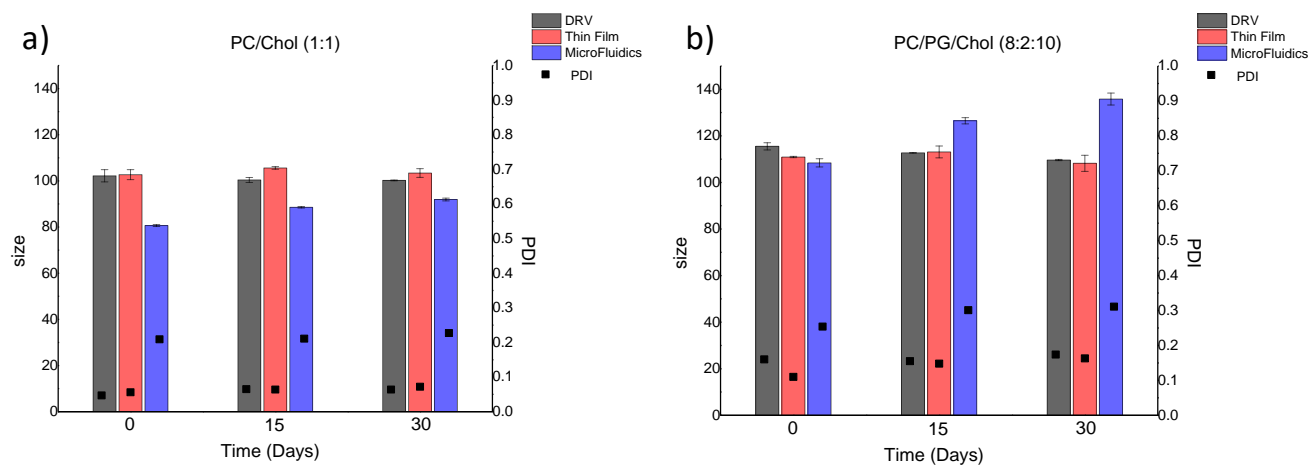

**Figure S1.** Mean hydrodynamic diameter (nm) and PDI values of Dapto liposomes, after preparation and after storage at 4°C for 15 d and 30 d. **a)** PC/Chol (1:1, mol/mol) liposomes; **b)** PC/PG/Chol (8:2:10, mol/mol) liposomes.
