# Supplementary material for: Daptomycin Liposomes Exhibit Enhanced Activity against Staphylococci Biofilms Compared to Free Drug
Source: Preprints.org preprint supplement (doi:10.20944/preprints202402.1422.v1), 2024-02-26
Supplement: Supplementary file 3 [file supplementary]

Archive with 2 entries (2 files):
- Supplementary Figure 1.pdf
- Supplementary Figure 2.pdf
